# Supplementary material
Source: PubMed Central journal article supplement (PMC2151687)
Supplement: plntphys_pp.107.106955_1.pdf [file plntphys_pp.107.106955_1.pdf]

Supplemental table S1: Primer sequences used for real-time RT-PCR.

| <i>MtGl 8</i> <sup>1)</sup> | short annotation                            | forward primer        | reverse primer        | T <sub>m</sub><br>[°C] | T <sub>m</sub><br>[°C] | amplicon<br>[bp] |
|-----------------------------|---------------------------------------------|-----------------------|-----------------------|------------------------|------------------------|------------------|
| EST332714                   | Suc transporter SUT4                        | ttgcaactctctcttaaca   | cattattagcaacatccaaaa | 53.0                   | 53.2                   | 339              |
| NF062D01                    | Vacuolar acid Inv Psl-1                     | gattttatccatgaagaac   | gacgtacgttgaatctgtaa  | 53.0                   | 53.0                   | 312              |
| NF112E11                    | Alkaline/neutral Inv                        | tggatttttactacgagca   | taatagaatgagagagcga   | 52.9                   | 52.9                   | 339              |
| TC94194                     | Granule-bound glycogen synthase             | gctcttcaactacctgat    | gagctcttcaacagagatt   | 52.9                   | 53.0                   | 351              |
| TC94273                     | Beta-amylase                                | taaccaaatcatalgtaatgc | tgctcattaagaacatcaac  | 52.9                   | 53.1                   | 276              |
| TC94328                     | UDP-Glc pyrophosphorylase                   | ctgggagctatagtgactt   | gctgaagaacttttactccat | 53.1                   | 53.0                   | 346              |
| TC94405                     | Hexokinase                                  | tctttcatcattgactcag   | tcaacatctgagcactctc   | 53.0                   | 53.0                   | 284              |
| TC94438                     | Suc transporter                             | cggtgttctcttactat     | agccaatttagtaacaaaac  | 53.0                   | 53.0                   | 283              |
| TC94447                     | MtSucS3                                     | atatgagcatctactcccat  | tctaagctttggattcctc   | 53.0                   | 52.9                   | 297              |
| TC94515                     | Enod40                                      | atatacaaaaggattatgct  | aatttcaaaaggaagacaac  | 53.0                   | 52.8                   | 320              |
| TC94631                     | Asp aminotransferase 2                      | tcatactaaagcagataggca | tgcaatcactatgatttgg   | 53.0                   | 52.9                   | 278              |
| TC94692                     | Trehalose-6-P phosphatase                   | ggttactctcttggatcc    | tttctagggacaaaataacc  | 53.0                   | 52.9                   | 370              |
| TC94709                     | UDP-sugar pyrophosphorylase                 | ctatogaaccaattgactaca | agtactccacacagaaacct  | 53.0                   | 53.0                   | 350              |
| TC94780                     | Glutamate synthase                          | acacacagtgatgacttagga | atctaccctaataccaccaa  | 53.0                   | 53.0                   | 251              |
| TC95549                     | H(+)/hexose cotransporter                   | attcttcttagctgaaac    | aataatcccgaatttgaag   | 53.0                   | 52.9                   | 284              |
| TC95763                     | Suc-phosphatase                             | aaacaactgaggaagagaag  | aatcaactctcactgtat    | 53.0                   | 52.9                   | 343              |
| TC95820                     | MtSucS2                                     | aaacaaggactgattcact   | tcaggataacattglaactcg | 53.1                   | 53.0                   | 274              |
| TC96236                     | Acid beta-fructofuranosidase prec.          | ttggaagctgataagaaga   | aggagtgtactcagaagagc  | 53.0                   | 52.9                   | 337              |
| TC96622                     | Gln synthetase 1                            | atgcatacaagcaactcatal | ttcacatattatacatccgc  | 53.0                   | 52.9                   | 297              |
| TC97643                     | Suc transporter 4                           | tacagctctctcttaacc    | atagcaaaaggacgataattc | 53.1                   | 53.0                   | 297              |
| TC98648                     | SucS2 [MtSucS4]                             | aagatactcttctgctcacc  | gttctcttgaagctgagat   | 52.9                   | 53.0                   | 332              |
| TC99016                     | SucS [MtSucS5]                              | gtagtctctggatcaatgta  | gaagaatctccaacaattac  | 52.9                   | 53.0                   | 332              |
| TC99238                     | Alkaline/neutral Inv                        | tctagtctggtagcaatgtg  | agatggaataaaatcacgaat | 53.2                   | 53.0                   | 313              |
| TC99506                     | Acid Inv                                    | gtgtaaaggctagttggat   | gcaaatagttccagtctct   | 52.9                   | 53.0                   | 321              |
| TC99699                     | Monosaccharide transporter                  | tcaacttctcatagctcaa   | tcaatcatgacactaaatgc  | 53.0                   | 53.7                   | 327              |
| TC100150                    | Carbonic anhydrase                          | tctcccaagttatggattt   | ggaagataaaccaatttcac  | 53.1                   | 53.1                   | 326              |
| TC100309                    | Enolase                                     | ataaccaaccttagttgagc  | caccaacaaaaatcgttacta | 52.9                   | 53.1                   | 267              |
| TC100391                    | Asn synthetase                              | ctagtctctgctgctgaa    | gaatccattctcaattctc   | 53.0                   | 53.0                   | 338              |
| TC100393                    | Asn synthetase 1                            | attgtgagtattgacact    | tgctagagtacaaatgaccag | 53.1                   | 53.2                   | 275              |
| TC100410                    | MtSucS1                                     | ctttggaattctcagactt   | gacatcatctgagcaaaagta | 53.0                   | 53.0                   | 368              |
| TC100484                    | UDP-glucose 6-dehydrogenase                 | ftcaagacactgattaccag  | taaaacataaaagctccaaca | 52.9                   | 53.0                   | 365              |
| TC100558                    | Pyruvate kinase                             | cagaggcttgatctatatt   | gtggacaacacaaaagtta   | 52.9                   | 52.9                   | 302              |
| TC100561                    | Pyruvate decarboxylase 1                    | ggcccattttaagactac    | caattttgacagttaacca   | 52.9                   | 53.1                   | 365              |
| TC100586                    | Leghemoglobin 29                            | acaagaggcttggtagtag   | caactcttgattgtttga    | 53.1                   | 53.2                   | 361              |
| TC100851                    | Multifunctional aquaporin                   | atcatgtatgcagagatcaa  | tctctgcacattaaagaaa   | 53.2                   | 53.0                   | 337              |
| TC101462                    | Cellulose synthase                          | cttgagaggttgcttatact  | gtctactcctgcaagaactt  | 53.1                   | 53.0                   | 332              |
| TC101691                    | Monosaccharide transporter                  | tctctatgagcacaattcac  | gtcatacaagtgctgagaaa  | 53.0                   | 53.1                   | 272              |
| TC103015                    | Tuber-spec. & SURE binding fact.            | taataacgctatgattgaa   | gattgttcatctctgtga    | 52.9                   | 52.8                   | 330              |
| TC103232                    | Suc-P synthase                              | agagaggaacactagattgga | ccgtgaactactatgagaaca | 53.1                   | 53.0                   | 341              |
| TC103335                    | Hexose transporter HT2                      | gcttattccaagtgagattt  | cctctgtccttaacatacc   | 53.0                   | 53.1                   | 301              |
| TC103706                    | Cell wall Inv 2                             | accattgagtacaaggact   | taatccattcccttagaaaag | 53.0                   | 53.0                   | 322              |
| TC104674                    | Impaired Suc ind. 1-like protein            | acaaagggatatctggaagt  | acatcctccaaaactctaag  | 53.0                   | 52.8                   | 366              |
| TC106485                    | Translation elongation factor EF-1 $\alpha$ | ccagtttattttccagttt   | caatcaaggacaaatttaca  | 53.0                   | 53.0                   | 278              |
| TC106499                    | Neutral Inv                                 | attgacatgttctctct     | actgttgacagcatcagtag  | 53.0                   | 53.0                   | 313              |
| TC106591                    | Leghemoglobin                               | attgcaaatcaaatagcaaa  | catctcccaataactctctc  | 53.0                   | 53.0                   | 326              |
| TC106592                    | Leghemoglobin 1                             | agaatcaaaagaacctctgt  | tgaattgaccataacaacatt | 53.0                   | 53.0                   | 279              |

|                             |                                                 |                       |                       |      |      |     |
|-----------------------------|-------------------------------------------------|-----------------------|-----------------------|------|------|-----|
| TC106651                    | Alpha-1,4-glucan-prot. synthase                 | ctattggacgttacgatgata | ggatcaatagtccaagtttc  | 53.0 | 53.0 | 297 |
| TC106696                    | Nodulin 25                                      | cataactgatgaggaactaga | gggataaaaattccttttga  | 53.1 | 52.9 | 293 |
| TC106729                    | Gln synthetase                                  | gtgttcttcttctcttcac   | gggtgaaacatcacaaatcac | 53.2 | 52.9 | 340 |
| TC106808                    | Gln synthetase                                  | ctgcctcatttctctctat   | gtaactggtcctgtagagtc  | 53.0 | 52.9 | 282 |
| TC106886                    | Alkaline/neutral Inv                            | cagatgaaaccagtgattaa  | acatgcaattaatgaaacaag | 52.9 | 53.0 | 294 |
| TC106913                    | Gln synthetase                                  | cctatatctcaagcaatttt  | ccttgaatgagcatcagata  | 53.0 | 53.0 | 340 |
| TC106918                    | Asp aminotransferase 1                          | caatcacacaaggttttcaa  | cactgcaaaagaaagtaaca  | 53.0 | 53.0 | 265 |
| TC107075                    | Phosphoenolpyruvate carboxylase                 | atggagatggttagatgaac  | acagatccttgaaactagga  | 53.1 | 53.2 | 336 |
| TC107108                    | Cell wall Inv                                   | aaatctacgtatgaaccaggt | cacatgagaaccaaatctta  | 53.0 | 52.9 | 329 |
| TC107108                    | Cell wall Inv                                   | tgttgagatgattatggga   | actgggttcatacgtagatt  | 53.0 | 53.0 | 252 |
| TC107189                    | Malate dehydrogenase                            | aaattctaaacagaaggggtg | catttgatcctgacagtta   | 52.9 | 52.9 | 260 |
| TC107257                    | Calmodulin-like protein 1                       | gataaagcgtatttcagact  | ccgtgattgtcaagtaataa  | 53.0 | 53.0 | 281 |
| TC107357                    | Nitrate reductase                               | taaacaagatctctcagca   | ggttttaactaaaccggata  | 53.0 | 53.0 | 350 |
| TC107440                    | H(+)/monosacch. cotransporter                   | gatgtgatgctgattttaga  | gacaaatcaacattgaacac  | 53.0 | 53.0 | 357 |
| TC107513                    | Suc-P synthase                                  | tatgatggtttgatccagta  | gatgttcttctaggatctgg  | 53.1 | 53.1 | 305 |
| TC107845                    | Suc transporter 4                               | ctggctctattagctattcc  | caacactcaaaaataaggtca | 52.9 | 53.0 | 307 |
| TC109967                    | Hexokinase 3                                    | aacltctgtattactgctgtg | atcaagacctgtctctcaat  | 53.0 | 52.9 | 365 |
| TC110297                    | Alpha-amylase                                   | cgtgctgtaacatctact    | tcgtgtctatggttatcttg  | 53.0 | 53.0 | 326 |
| <b>Gene ID<sup>2)</sup></b> |                                                 |                       |                       |      |      |     |
| SMa0677                     | put. Glu/Asp transport protein                  | gattccctgatcatagtctc  | agaggttctgtctcgatag   | 52.8 | 53.8 | 287 |
| SMa0815                     | NifA, transcriptional activator                 | aaagtgtactcctctcctata | aggagagacaagataacagc  | 53.1 | 52.9 | 303 |
| SMa0816                     | FixX, ferredoxin-like protein                   | atccgaactgaagagga     | gaagacaagcttaccagaac  | 52.9 | 53.4 | 288 |
| SMa0817                     | FixC, oxidoreductase protein                    | tagcatcgttttagagaga   | agaccatggagagaccttac  | 53.0 | 53.1 | 336 |
| SMa0819                     | FixB, electron transfer flavoprotein            | cttcaagagctgaaggttct  | cactgagctaaatgttgattc | 53.9 | 52.6 | 348 |
| SMa0825                     | NifH, nitrogenase iron protein                  | gatgtcgattacgtctcatac | gatcactgtcatcttctgag  | 52.2 | 52.2 | 353 |
| SMa0827                     | NifD, nitrogenase Fe-Mo                         | gcaaagctaaatctatccac  | aggtcctcataggcagtaata | 53.6 | 53.2 | 328 |
| SMa0830                     | NifE, oxidoreductase                            | caagctttaccactgatgta  | aggatattgatgctgtagac  | 53.2 | 53.6 | 351 |
| SMa0831                     | NifX, N fixation protein                        | cgattgctactgaagataga  | ttgatcggatgaatcttt    | 53.2 | 53.0 | 290 |
| SMb20020                    | Pyruvate dehydrogenase                          | tcctttgatattcctttt    | aagattctctaccagttctcg | 52.5 | 52.9 | 367 |
| SMb20263                    | put. ABC transp. periplasm. AA-binding protein  | agtcctcgaagacatgaa    | gaacaggtgaggtagttgag  | 53.1 | 54.0 | 337 |
| SMb20611                    | DctA, C <sub>4</sub> -dicarboxylate transporter | aagggcatgtagatattggt  | ctatctgacgtcttctctt   | 52.7 | 53.9 | 276 |
| SMc00169                    | DME, NAD-malic enzyme oxidored.                 | cgactatgctgatgattatt  | acataggtatcggtgaagaag | 52.1 | 53.5 | 296 |

1) DFCI *Medicago truncatula* Gene Index 8; <http://compbio.dfci.harvard.edu/>

2) *Sinorhizobium meliloti* genome database; <http://bioinfo.genopole-toulouse.prd.fr>

Abbreviations: bp, base pairs; Tm, melting temperature for forward and reverse primer, respectively; P, phosphate
