# Supplementary material
Source: PubMed Central journal article supplement (PMC2151687)
Supplement: plntphys_pp.107.106955_2.pdf [file plntphys_pp.107.106955_2.pdf]

Supplemental table S2: Expression profiles of selected plant and *S. meliloti* genes in MtSucS1-reduced lines in comparison to control lines.

| cluster  | DFCI MtGI 8 | short annotation                                 | as12 vs. c                                           | as19 vs. c         |                    |
|----------|-------------|--------------------------------------------------|------------------------------------------------------|--------------------|--------------------|
| I        | TC100410    | SucS1                                            | -7,85 <sup>b</sup>                                   | -3,04 <sup>b</sup> |                    |
|          | TC99016     | SucS5                                            | -2,97 <sup>b</sup>                                   | -1,16              |                    |
|          | TC99699     | Monosaccharide transporter                       | -7,90 <sup>b</sup>                                   | -2,34 <sup>a</sup> |                    |
|          | TC107108    | Cell wall Inv                                    | -2,52                                                | -1,27              |                    |
|          | NF062D01    | Vacuolar acid Inv Psl-1                          | -3,27 <sup>b</sup>                                   | -1,54              |                    |
|          | TC94273     | $\beta$ -amylase                                 | -1,94                                                | -1,19              |                    |
|          | TC95820     | SucS2                                            | -1,60 <sup>a</sup>                                   | -1,91 <sup>b</sup> |                    |
|          | TC94447     | SucS3                                            | -3,14 <sup>b</sup>                                   | -3,77 <sup>b</sup> |                    |
|          | TC101691    | Monosaccharide transporter                       | -1,29                                                | -1,55              |                    |
|          | TC103015    | Tuber-specific & SURE binding factor             | -1,82 <sup>a</sup>                                   | -2,36 <sup>a</sup> |                    |
|          | TC98648     | SucS4                                            | -1,98 <sup>a</sup>                                   | -1,90 <sup>b</sup> |                    |
|          | TC107440    | H <sup>+</sup> /Monosaccharide cotransporter     | -2,05 <sup>a</sup>                                   | -2,20 <sup>a</sup> |                    |
|          | TC106499    | Neutral Inv                                      | -1,96 <sup>a</sup>                                   | -2,03 <sup>a</sup> |                    |
|          | TC99506     | Acid Inv                                         | -3,58 <sup>b</sup>                                   | -2,55 <sup>a</sup> |                    |
|          | TC107845    | Suc transporter 4                                | -2,23                                                | -1,61              |                    |
|          | EST332714   | Suc transporter SUT4                             | -1,49                                                | -1,14              |                    |
|          | TC101015    | Phosphoenolpyruvate carboxylase                  | -1,91 <sup>b</sup>                                   | -1,57 <sup>a</sup> |                    |
|          | II          | TC96236                                          | Acid beta-fructofuranosidase prec.                   | -1,04              | 1,47               |
|          |             | TC110297                                         | $\alpha$ -amylase                                    | -1,24              | 1,77 <sup>a</sup>  |
| TC103706 |             | Cell wall Inv 2                                  | -1,12                                                | 1,71               |                    |
| TC107513 |             | Suc-P synthase                                   | -1,15                                                | 1,81 <sup>b</sup>  |                    |
| TC100309 |             | Enolase                                          | -1,15                                                | 2,10 <sup>a</sup>  |                    |
| TC100586 |             | Leghemoglobin 29                                 | -1,16                                                | 2,03 <sup>b</sup>  |                    |
| TC94515  |             | Enod40                                           | -1,49                                                | 1,61 <sup>a</sup>  |                    |
| TC106591 |             | Leghemoglobin                                    | -1,01                                                | 3,46 <sup>b</sup>  |                    |
| TC106696 |             | Nodulin 25                                       | -1,07                                                | 2,72 <sup>a</sup>  |                    |
| TC94692  |             | Trehalose 6-P phosphatase                        | -5,23 <sup>a</sup>                                   | 1,47               |                    |
| TC95549  |             | H <sup>+</sup> /hexose cotransporter             | -5,01 <sup>b</sup>                                   | 1,35               |                    |
| TC100484 |             | UDP-Glc 6-dehydrogenase                          | -7,19 <sup>a</sup>                                   | 1,24               |                    |
| TC100391 |             | Asn synthetase 1                                 | -1,56                                                | 1,12               |                    |
| TC101462 |             | Cellulose synthase                               | -1,84 <sup>a</sup>                                   | 1,33               |                    |
| TC94709  |             | UDP-sugar pyrophosphorylase                      | -1,91                                                | 1,06               |                    |
| TC107339 |             | Enod18                                           | -1,79                                                | 1,12               |                    |
| III      |             | TC107189                                         | Malate dehydrogenase                                 | 1,64 <sup>a</sup>  | 1,66               |
|          |             | TC107357                                         | Nitrate reductase                                    | 3,59 <sup>a</sup>  | 3,19 <sup>b</sup>  |
|          |             | TC106918                                         | Asp aminotransferase                                 | 2,17 <sup>a</sup>  | 1,89 <sup>a</sup>  |
|          | TC106886    | Alkaline/neutral Inv                             | 2,60 <sup>b</sup>                                    | 1,57               |                    |
|          | TC100558    | Pyruvate kinase                                  | 1,07                                                 | 1,58 <sup>a</sup>  |                    |
|          | TC100150    | Carbonic anhydrase                               | 1,71 <sup>a</sup>                                    | 2,60 <sup>b</sup>  |                    |
|          | TC106913    | Gln synthetase                                   | 1,31                                                 | 1,79 <sup>b</sup>  |                    |
|          | TC103232    | Suc-P synthase                                   | 1,17                                                 | 1,50 <sup>a</sup>  |                    |
|          | TC100561    | Pyruvate decarboxylase 1                         | 1,63                                                 | 2,16 <sup>b</sup>  |                    |
|          | TC106651    | $\alpha$ -1,4-glucan-protein synthase            | 1,14                                                 | 1,52 <sup>b</sup>  |                    |
|          | TC94328     | UDP-Glc pyrophosphorylase                        | 1,32                                                 | 2,25 <sup>b</sup>  |                    |
|          | TC94194     | Granule-bound glycogen (starch) synthase         | 1,55                                                 | 2,49 <sup>b</sup>  |                    |
|          | TC107257    | Calmodulin-like protein 1                        | 1,28                                                 | 2,29 <sup>b</sup>  |                    |
|          | TC96622     | Gln synthetase 1                                 | 1,49                                                 | 3,73               |                    |
|          | IV          | SMb20611                                         | DctA, C <sub>4</sub> -dicarboylate transport protein | -1,70              | -1,01              |
|          |             | SMa0819                                          | FixB, electron transfer flavoprotein                 | -1,51              | -1,48              |
|          |             | SMc00169                                         | DME, NAD-malic enzyme oxidoreductase                 | -3,25              | -4,76 <sup>a</sup> |
|          |             | SMb20020                                         | Pyruvate dehydrogenase                               | -2,03              | -3,83 <sup>b</sup> |
|          |             | SMa0677                                          | put. Glu/Asp transport protein                       | -1,52              | -3,34 <sup>b</sup> |
| SMb20263 |             | put. ABC transporter periplasm. AA-binding prot. | -1,80                                                | -3,86 <sup>a</sup> |                    |
| SMa0831  |             | NifX, N fixation protein                         | 1,03                                                 | 1,58 <sup>a</sup>  |                    |
| SMa0817  |             | FixC, oxidoreductase protein                     | 1,08                                                 | 1,48               |                    |

Data represent ratios from mean nodule expression data derived from at least three biological replicates per *MtSucS1*-antisense line and 6 per controls. Each biological replicate was based on nodule pools derived from three individual plants. Significant differences are indicated by <sup>a</sup> and <sup>b</sup> ( $p < 0,05$  and  $< 0,01$ , respectively).
