# Supplementary material
Source: PubMed Central journal article supplement (PMC2151687)
Supplement: plntphys_pp.107.106955_3.pdf [file plntphys_pp.107.106955_3.pdf]

Supplemental table S3: Response ratios of selected metabolite levels in root nodules of *MtSucS1*-antisense and control plants at time-points 21 and 26 dpi, respectively.

|                                                        | response ratios as vs. c |                    |                    |                    |
|--------------------------------------------------------|--------------------------|--------------------|--------------------|--------------------|
|                                                        | 21 dpi                   |                    | 26 dpi             |                    |
|                                                        | as12                     | as19               | as12               | as19               |
| <b>amino acids</b>                                     |                          |                    |                    |                    |
| Glycine                                                | -1,65                    | -1,18              | -1,03              | 1,09               |
| L-Alanine                                              | 1,02                     | 1,26               | -1,30              | -1,10              |
| L-Arginine                                             | -1,87 <sup>a</sup>       | -2,02 <sup>b</sup> | -1,60 <sup>a</sup> | -1,39              |
| L-Asparagine                                           | -1,59 <sup>a</sup>       | 1,15               | -1,23              | -1,13 <sup>a</sup> |
| L-Aspartate                                            | -1,06                    | 1,04               | -1,06              | 1,08               |
| L-Cysteine                                             | -1,24                    | 1,23               | -1,21              | 1,20               |
| L-Glutamate                                            | -1,07                    | 1,26 <sup>a</sup>  | 1,11               | 1,37               |
| L-Glutamine                                            | -1,37                    | 1,68               | 1,03               | 1,95               |
| L-Histidine                                            | -2,53                    | -1,18              | 1,13               | 1,79               |
| L-Homocysteine                                         | -1,42                    | -2,93              | -1,02              | -1,40              |
| L-Homoserine                                           | -1,90 <sup>b</sup>       | -2,66 <sup>b</sup> | -2,22 <sup>b</sup> | -1,30              |
| L-Isoleucine                                           | -1,67 <sup>a</sup>       | -1,58 <sup>b</sup> | -1,34              | 1,01               |
| L-Leucine                                              | -2,17                    | -1,43              | -2,17 <sup>a</sup> | -1,12              |
| L-Lysine                                               | -3,09 <sup>b</sup>       | -2,79 <sup>b</sup> | -3,40 <sup>b</sup> | -2,42 <sup>b</sup> |
| L-Methionine                                           | -2,38 <sup>a</sup>       | -2,98 <sup>b</sup> | -2,40 <sup>b</sup> | -1,79              |
| L-Phenylalanine                                        | -1,94 <sup>b</sup>       | -1,33              | -2,10 <sup>b</sup> | -1,17              |
| L-Proline                                              | -2,01 <sup>b</sup>       | -1,56 <sup>b</sup> | -1,74 <sup>a</sup> | 1,06               |
| L-Serine                                               | -1,05                    | 1,03               | -1,06              | 1,06               |
| L-Threonine                                            | -1,36                    | -1,16              | -1,08              | 1,15               |
| L-Tryptophan                                           | -2,93 <sup>b</sup>       | -4,01 <sup>b</sup> | -1,64              | -1,76              |
| L-Tyrosine                                             | -1,85 <sup>b</sup>       | -1,71 <sup>a</sup> | -1,39              | -1,29              |
| L-Valine                                               | -1,25                    | 1,01               | -1,09              | 1,34               |
| 2-Aminoadipate                                         | -1,64                    | -2,10 <sup>b</sup> | -2,21 <sup>b</sup> | -3,05 <sup>b</sup> |
| 4-Aminobutyrate                                        | 1,13                     | 1,20               | 1,05               | 1,47               |
| $\alpha$ -Ketothioaminobutyrate                        | -2,45 <sup>b</sup>       | -2,30 <sup>b</sup> | -2,23 <sup>a</sup> | -1,08              |
| $\beta$ -Alanine                                       | -1,32                    | -1,28              | 1,38               | 1,48 <sup>a</sup>  |
| D/L-Diaminopimelate                                    | -1,26                    | -2,25 <sup>a</sup> | -1,00              | 1,36               |
| L,L-Cystathionine                                      | -2,45 <sup>a</sup>       | -3,89 <sup>b</sup> | -1,62              | -1,57              |
| Norvaline                                              | -1,03                    | -1,09              | -1,01              | 1,25               |
| N-Acetyl-L-glutamate                                   | -2,16 <sup>a</sup>       | -1,76              | 1,68               | -1,15              |
| O-Acetyl-L-Homoserine                                  | -1,49                    | -1,32              | 1,05               | -1,18              |
| O-Acetyl-L-Serine                                      | -1,05                    | 1,39               | 1,61               | 1,59               |
| Ornithine-Arginine-Citrulline                          | -1,41                    | -1,09              | -1,32              | 1,03               |
| <b>N-containing compounds, purines and pyrimidines</b> |                          |                    |                    |                    |
| Adenine                                                | -1,12                    | 1,08               | -1,16              | 1,23               |
| Urea                                                   | -3,00 <sup>b</sup>       | -2,22 <sup>a</sup> | -1,24              | -1,50              |
| Thymine                                                | -1,28                    | -1,48 <sup>a</sup> | -1,16              | -1,12              |
| Uracil                                                 | -1,59 <sup>a</sup>       | -1,34              | -1,21              | -1,03              |
| Agmatine                                               | -1,12                    | -1,29              | 2,25               | 1,90 <sup>b</sup>  |
| <b>organic acids and carbohydrates</b>                 |                          |                    |                    |                    |
| 2-Hydroxyglutarate                                     | -1,68 <sup>b</sup>       | -1,15              | -1,33              | -1,09              |
| 2-Isopropylmalate                                      | -1,19                    | 1,93               | -1,07              | 1,50               |
| 2-Ketoglutarate                                        | -1,46                    | -1,49              | -1,60              | -1,85              |
| Citrate                                                | -1,92                    | 1,06               | 1,14               | 1,06               |
| Fumarate                                               | -1,62                    | 1,08               | -1,02              | 1,53               |
| Glucarate                                              | -1,77                    | -4,13 <sup>a</sup> | -1,53              | 1,19               |
| Glycerate                                              | -1,67                    | -1,26              | -1,23              | 1,06               |
| Gluconate                                              | -1,44                    | -1,33              | -1,45 <sup>a</sup> | -1,12              |
| Isocitrate                                             | -1,12                    | -1,07              | 1,11               | -1,05              |
| L-Malate                                               | -1,02                    | -1,20              | -1,09              | -1,10              |
| Maleate                                                | -1,30                    | -1,05              | 1,04               | -1,15              |
| Malonate                                               | -2,15 <sup>a</sup>       | -4,26 <sup>b</sup> | -1,73 <sup>a</sup> | -2,23 <sup>b</sup> |
| Methylcitric acid derivative                           | -1,23                    | -1,23              | -1,19              | -1,05              |
| Orotate                                                | -1,46 <sup>a</sup>       | -1,30              | -1,11              | 1,14               |
| Panthenate                                             | -1,45                    | -1,23              | -1,36              | -1,08              |
| Pyruvate                                               | -1,51                    | -1,44              | -1,05              | -1,04              |
| Shikimate                                              | -1,16                    | 1,18               | 1,07               | 1,77 <sup>b</sup>  |
| Succinate                                              | -1,38                    | 1,18               | 1,18               | 1,51               |
| Threonate                                              | -1,11                    | 1,44 <sup>a</sup>  | 1,21               | 1,53 <sup>a</sup>  |
| Threonic acid lactone                                  | -1,37                    | 1,15               | 1,04               | 1,47 <sup>a</sup>  |
| $\alpha$ -Ketocaproate                                 | -1,37                    | -1,44              | -1,80 <sup>a</sup> | 1,20               |
| Pipecolate                                             | -2,20 <sup>a</sup>       | -1,39              | -2,33 <sup>a</sup> | 1,42               |
| Salicylate                                             | -1,26                    | -3,43              | 1,22               | 1,91               |
| <b>sugars and polyols</b>                              |                          |                    |                    |                    |
| Fructose                                               | 2,30 <sup>a</sup>        | 2,50 <sup>b</sup>  | 1,89 <sup>a</sup>  | 2,06 <sup>a</sup>  |
| Glucose                                                | 1,68                     | 1,73 <sup>b</sup>  | 1,55 <sup>a</sup>  | 1,70 <sup>a</sup>  |
| Raffinose                                              | 1,60                     | 1,08               | 1,91               | 1,22               |
| Ribose                                                 | 1,04                     | 1,12               | -1,31              | -1,10              |

|                   |                   |                   |                   |       |
|-------------------|-------------------|-------------------|-------------------|-------|
| Sucrose           | 1,36 <sup>a</sup> | 1,98 <sup>a</sup> | 1,67 <sup>a</sup> | 1,19  |
| Trehalose-Maltose | -1,08             | 1,45              | 1,17              | 1,71  |
| Myo-Inositol      | -1,36             | -1,02             | -1,12             | -1,01 |
| Pinitol           | 1,20              | -1,27             | -1,04             | -1,44 |

**phosphates**

|                            |                    |                    |       |                   |
|----------------------------|--------------------|--------------------|-------|-------------------|
| $\alpha$ -Glycerophosphate | -1,24              | 1,06               | 1,09  | 1,53              |
| Dihydroxyacetone-P         | -1,70              | -2,09 <sup>a</sup> | -1,07 | -1,73             |
| Erythrose-4-P              | -1,56              | 1,21               | 1,11  | 1,94              |
| Fructose-6-P               | 1,07               | 1,38               | 1,59  | 1,92 <sup>b</sup> |
| Glucose-6-P                | 1,11               | 1,44               | 1,57  | 2,18 <sup>b</sup> |
| Glycerate-2-P              | -1,08              | 1,04               | 1,56  | 1,53              |
| Glycerate-3-P              | -1,07              | 1,13               | 1,26  | 1,75 <sup>b</sup> |
| Myo-Inositol-P             | -1,27              | -1,08              | 1,07  | 1,17              |
| Phosphoenolpyruvate        | -1,31              | 1,21               | 1,33  | 1,57              |
| Ribose-5-P                 | -4,02 <sup>a</sup> | 2,20 <sup>b</sup>  | 1,05  | 2,79              |
| Ribulose-5-P               | -1,28              | -1,13              | 1,50  | 1,38              |

Data represent ratios of mean normalized data from at least six biological replicates per *MtSucS1*-antisense and 10 per control line. Each biological replicate was based on pools of nodules derived from three individual plants. Significant differences are indicated by <sup>a</sup> and <sup>b</sup> ( $p < 0,05$  and  $< 0,01$ , respectively). Abbreviations: dpi, days post inoculation; P, phosphate
