# Supplementary material
Source: PubMed Central journal article supplement (PMC2151687)

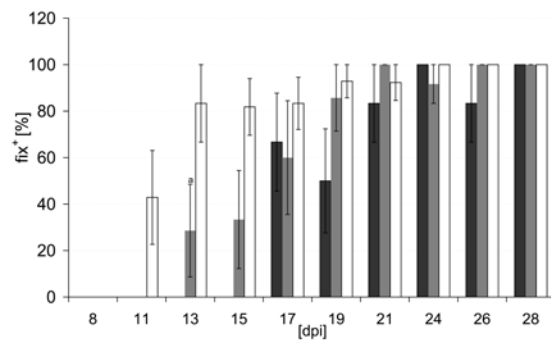

Supplement: plntphys_pp.107.106955_10.pdf [file plntphys_pp.107.106955_10.pdf]

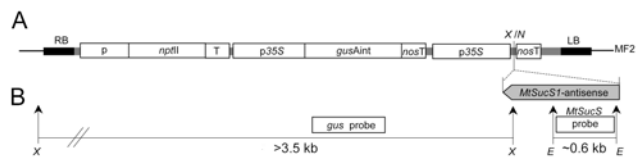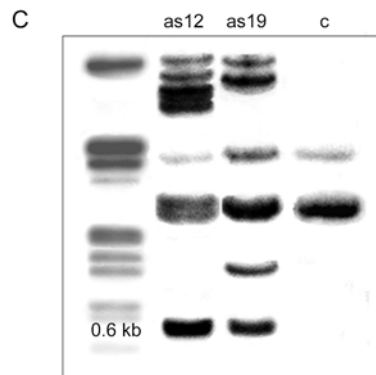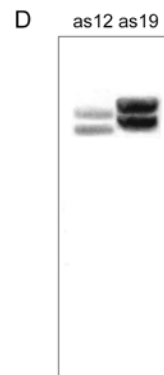

Supplement: plntphys_pp.107.106955_4.pdf [file plntphys_pp.107.106955_4.pdf]

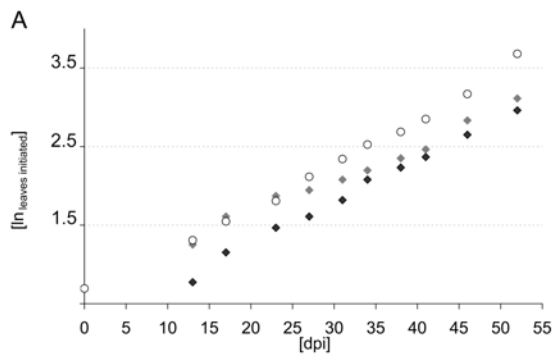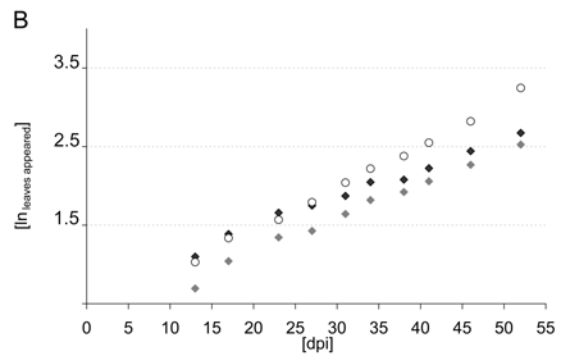

Supplement: plntphys_pp.107.106955_5.pdf [file plntphys_pp.107.106955_5.pdf]

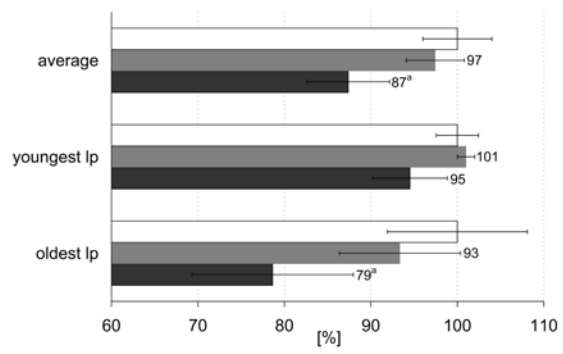

Supplement: plntphys_pp.107.106955_6.pdf [file plntphys_pp.107.106955_6.pdf]

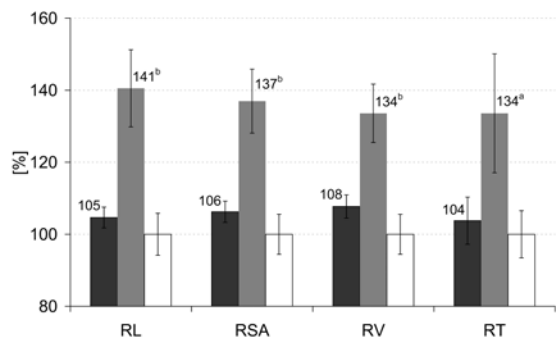

Supplement: plntphys_pp.107.106955_7.pdf [file plntphys_pp.107.106955_7.pdf]

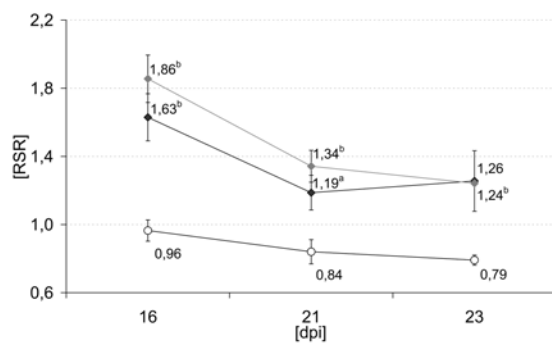

Supplement: plntphys_pp.107.106955_8.pdf [file plntphys_pp.107.106955_8.pdf]

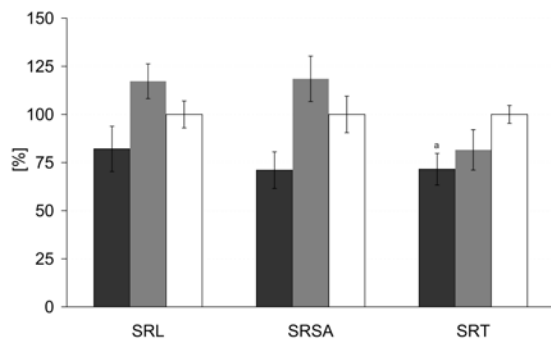

Supplement: plntphys_pp.107.106955_9.pdf [file plntphys_pp.107.106955_9.pdf]
